# Supplementary material for: Rootstocks for the Management of Bacterial Wilt in Eggplant (Solanum melongena L.) and Tomato (Solanum lycopersicum L.) in the Coastal Regions of India
Source: Hindawi journal article supplement (doi:10.1155/2022/8594080), 2022-03-25
Supplement: f1 [file 8594080.f1.docx]

**Supplementary Material**

**Rootstocks for the Management of Bacterial Wilt in Eggplant (*Solanum melongena* L.) and Tomato (*Solanum lycopersicum* L.) in the Coastal Regions of India**

Raman Ramesh*1, Marsha D’Souza1, Trupti Asolkar2, Gauri Achari3 and Mathala J. Gupta1

1ICAR- Central Coastal Agricultural Research Institute, Old Goa 403 402 Goa. India

*Corresponding author: [rameshicar@yahoo.co.in](mailto:rameshicar@yahoo.co.in)


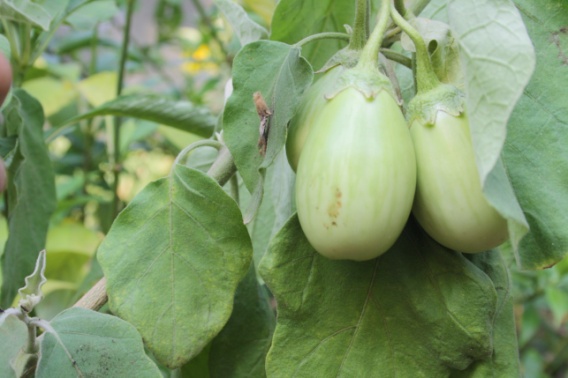

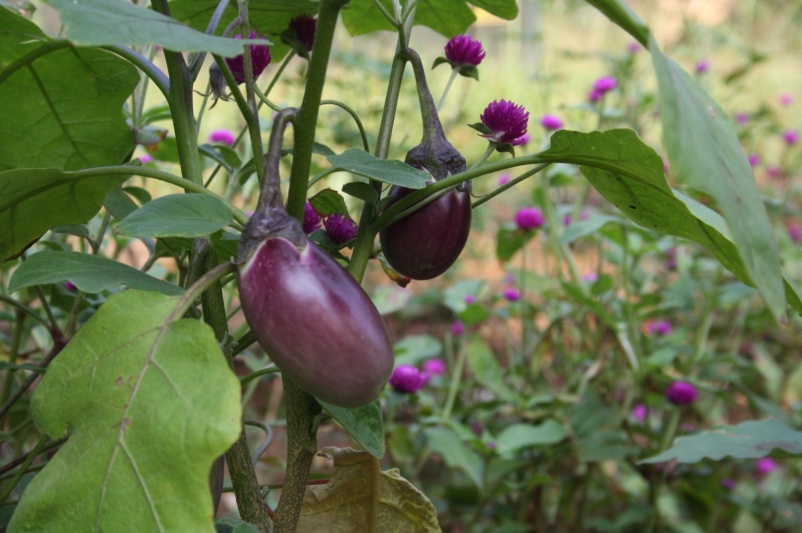

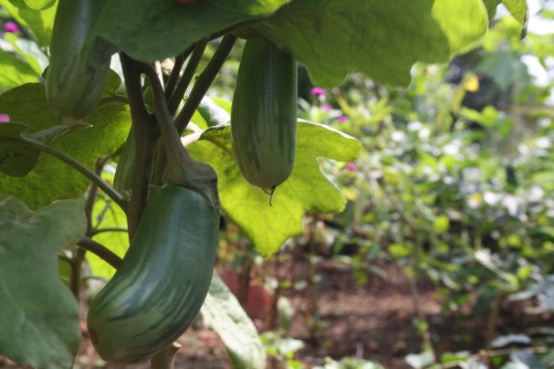

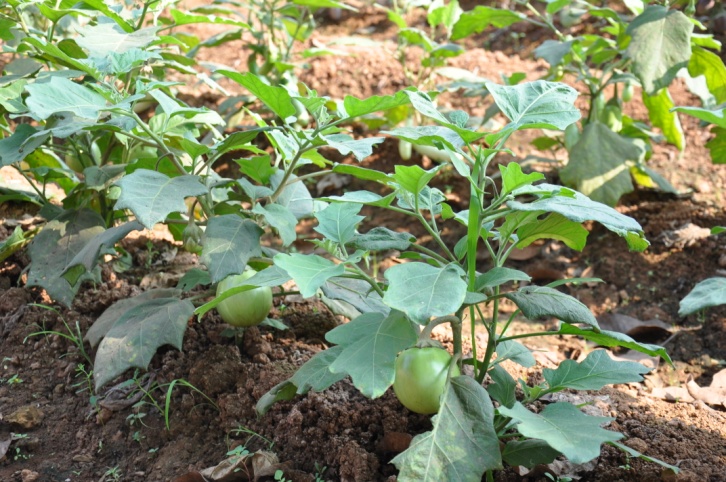

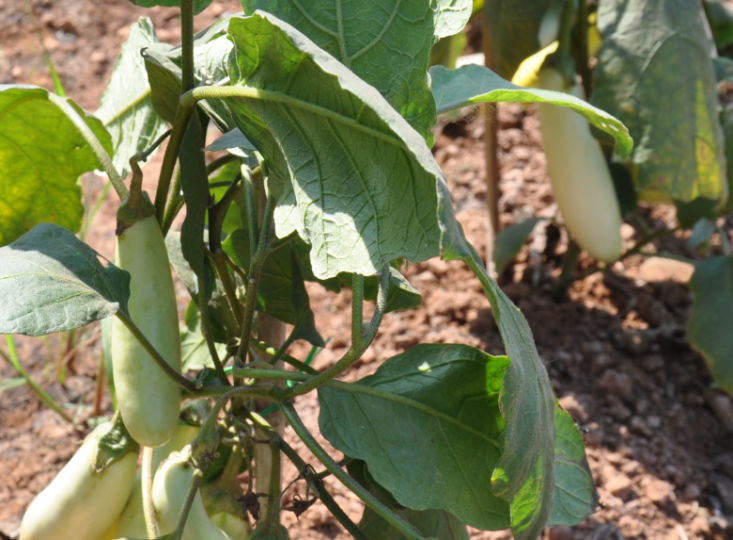


S00019 00022 S00004 S00003 TS02257

**Supplementary Fig. 1.** Fruit types of bacterial wilt resistant root stocks received from AVRDC
